# Supplementary material for: A recyclable metal-free catalytic system for the cationic ring-opening polymerization of glycidol under ambient conditions
Source: Royal Society of Chemistry journal article supplement (doi:10.1039/d1gc03063a), 2021-12-09
Supplement: d1gc03063a1.pdf [file d1gc03063a1.pdf]

# Recyclable Metal-Free Catalytic System for the Cationic Ring-Opening Polymerization of Glycidol under Ambient Conditions

*Si Eun Kim,<sup>1,2</sup> Hyun Ji Yang,<sup>1</sup> Soonyoung Choi,<sup>1</sup> Eunbyul Hwang,<sup>1</sup> Minseong Kim<sup>3,4</sup> Hyun-Jong Paik,<sup>2</sup> Ji-Eun Jeong,<sup>1</sup> Young Il Park,<sup>1</sup> Jin Chul Kim,<sup>1\*</sup> Byeong-Su Kim,<sup>3\*</sup> and Sang-Ho Lee<sup>1\*</sup>*

<sup>1</sup>Center for Advanced Specialty Chemicals, Korea Research Institute of Chemical Technology,  
Ulsan 44412, Republic of Korea

<sup>2</sup>Department of Polymer Science and Engineering, Pusan National University, Busan, 46241,  
Republic of Korea

<sup>3</sup>Department of Chemistry, Yonsei University, Seoul 03722, Republic of Korea

<sup>4</sup>Department of Chemistry, Ulsan National Institute of Science and Technology (UNIST), Ulsan  
44919, Republic of Korea

Correspondence and requests for materials should be addressed to

S.-H.L. (e-mail: [slee@kriect.re.kr](mailto:slee@kriect.re.kr)), B.-S.K. (e-mail: [bskim19@yonsei.ac.kr](mailto:bskim19@yonsei.ac.kr)). J.C.K. (e-mail: [jckim81@kriect.re.kr](mailto:jckim81@kriect.re.kr))

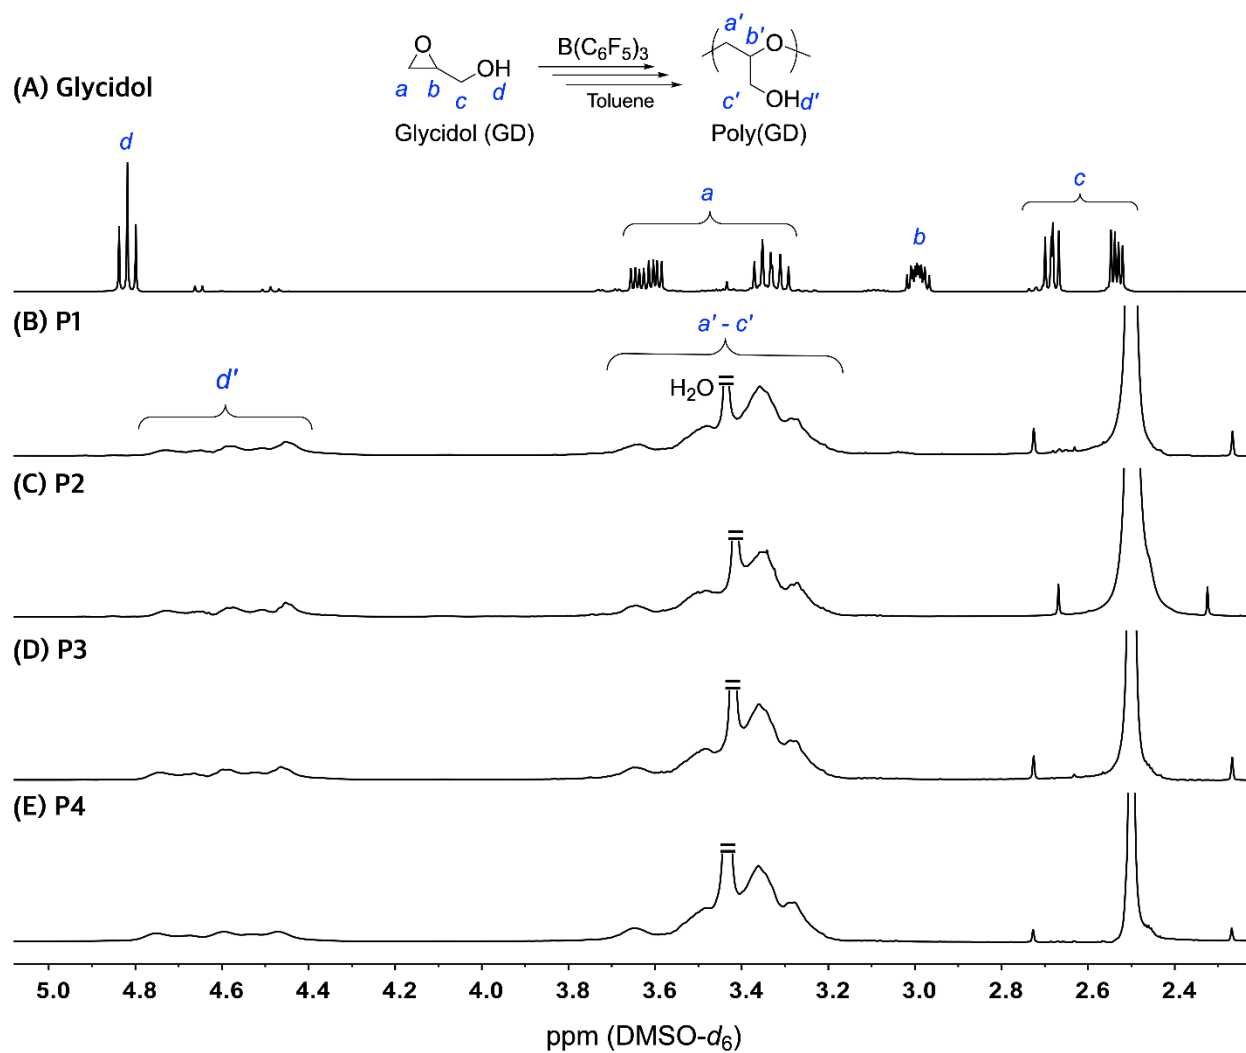

**Figure S1.**  $^1\text{H}$  NMR spectra (DMSO- $d_6$ , room temperature) of (A) GD, (B) P1 ( $[\text{GD}]_0 = 2500$  mM;  $[\text{B}(\text{C}_6\text{F}_5)_3]_0 = 1$  mM in toluene), (C) P2 ( $[\text{GD}]_0 = 2500$  mM;  $[\text{B}(\text{C}_6\text{F}_5)_3]_0 = 3$  mM in toluene), (D) P3 ( $[\text{GD}]_0 = 2500$  mM;  $[\text{B}(\text{C}_6\text{F}_5)_3]_0 = 5$  mM in toluene), and (E) P4 ( $[\text{GD}]_0 = 2500$  mM;  $[\text{B}(\text{C}_6\text{F}_5)_3]_0 = 10$  mM in toluene).

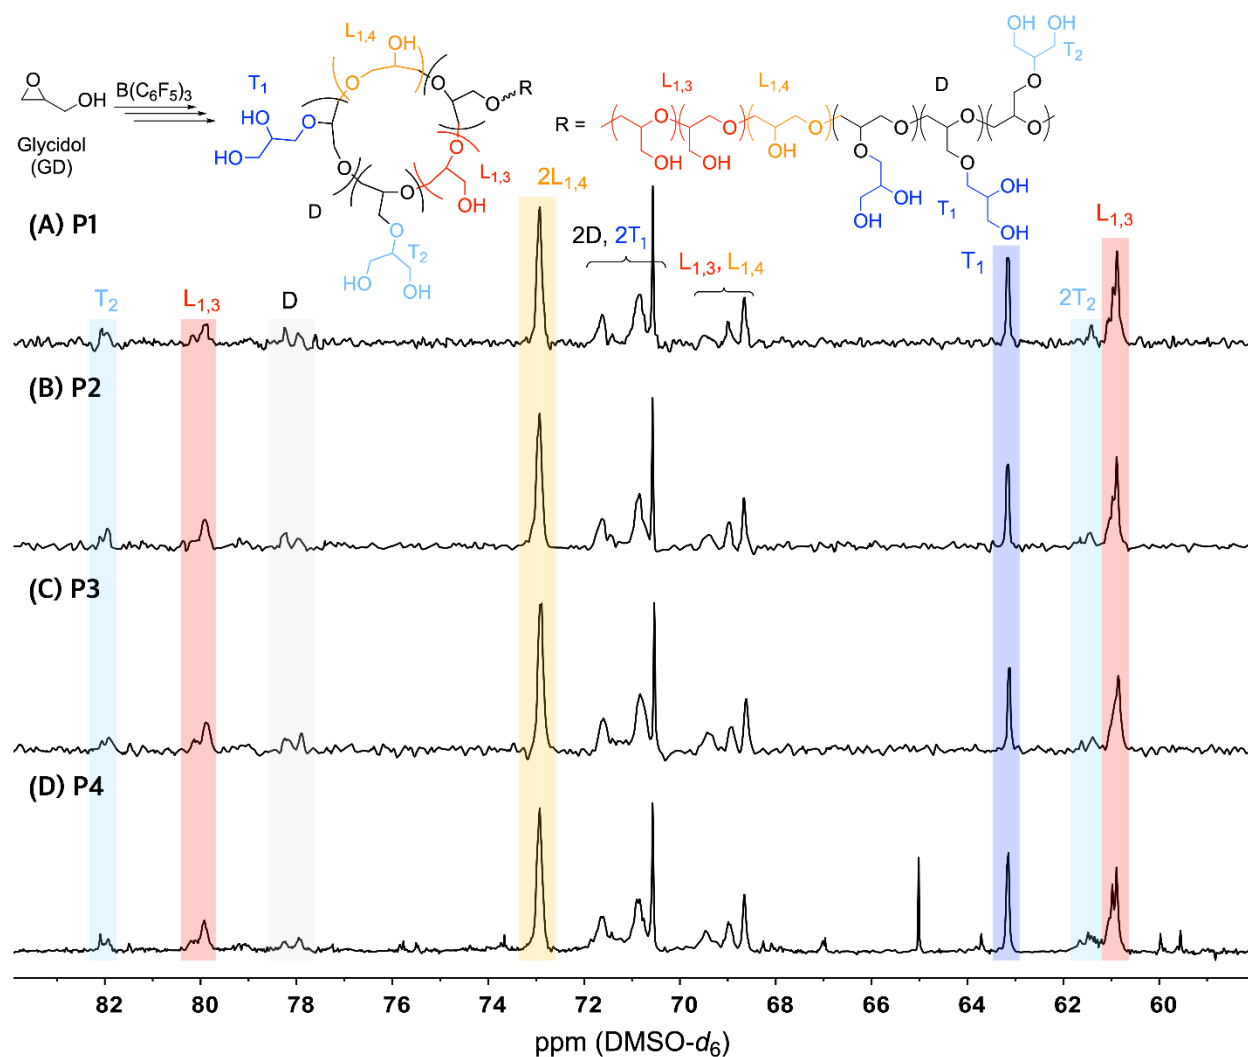

**Figure S2.** Inverse-gated  $^{13}C$  NMR spectra (DMSO-*d*<sub>6</sub>, room temperature) of (A) P1 ([GD]<sub>0</sub> = 2500 mM; [B(C<sub>6</sub>F<sub>5</sub>)<sub>3</sub>]<sub>0</sub> = 1 mM in toluene), (B) P2 ([GD]<sub>0</sub> = 2500 mM; [B(C<sub>6</sub>F<sub>5</sub>)<sub>3</sub>]<sub>0</sub> = 3 mM in toluene), (C) P3 ([GD]<sub>0</sub> = 2500 mM; [B(C<sub>6</sub>F<sub>5</sub>)<sub>3</sub>]<sub>0</sub> = 5 mM in toluene), and (D) P4 ([GD]<sub>0</sub> = 2500 mM; [B(C<sub>6</sub>F<sub>5</sub>)<sub>3</sub>]<sub>0</sub> = 10 mM in toluene).

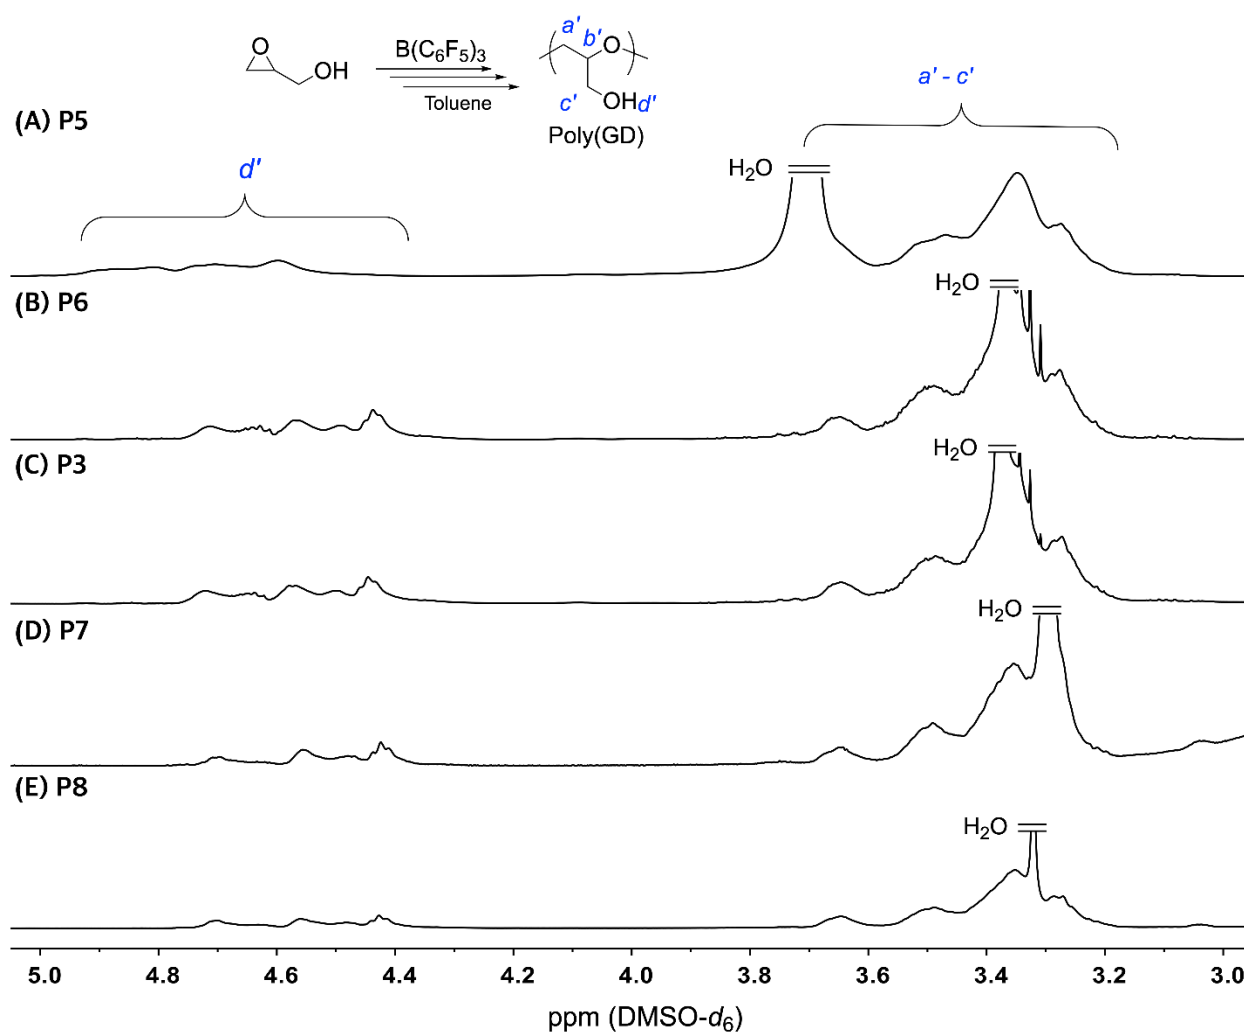

**Figure S3.**  $^1\text{H}$  NMR spectra (DMSO- $d_6$ , room temperature) of (A) P5 ( $[\text{GD}]_0 = 500$  mM;  $[\text{B}(\text{C}_6\text{F}_5)_3]_0 = 5$  mM in toluene), (B) P6 ( $[\text{GD}]_0 = 1000$  mM;  $[\text{B}(\text{C}_6\text{F}_5)_3]_0 = 5$  mM in toluene), (C) P3 ( $[\text{GD}]_0 = 2500$  mM;  $[\text{B}(\text{C}_6\text{F}_5)_3]_0 = 5$  mM in toluene), (D) P7 ( $[\text{GD}]_0 = 5000$  mM;  $[\text{B}(\text{C}_6\text{F}_5)_3]_0 = 5$  mM in toluene), and (E) P8 ( $[\text{GD}]_0 = 10000$  mM;  $[\text{B}(\text{C}_6\text{F}_5)_3]_0 = 5$  mM in toluene).

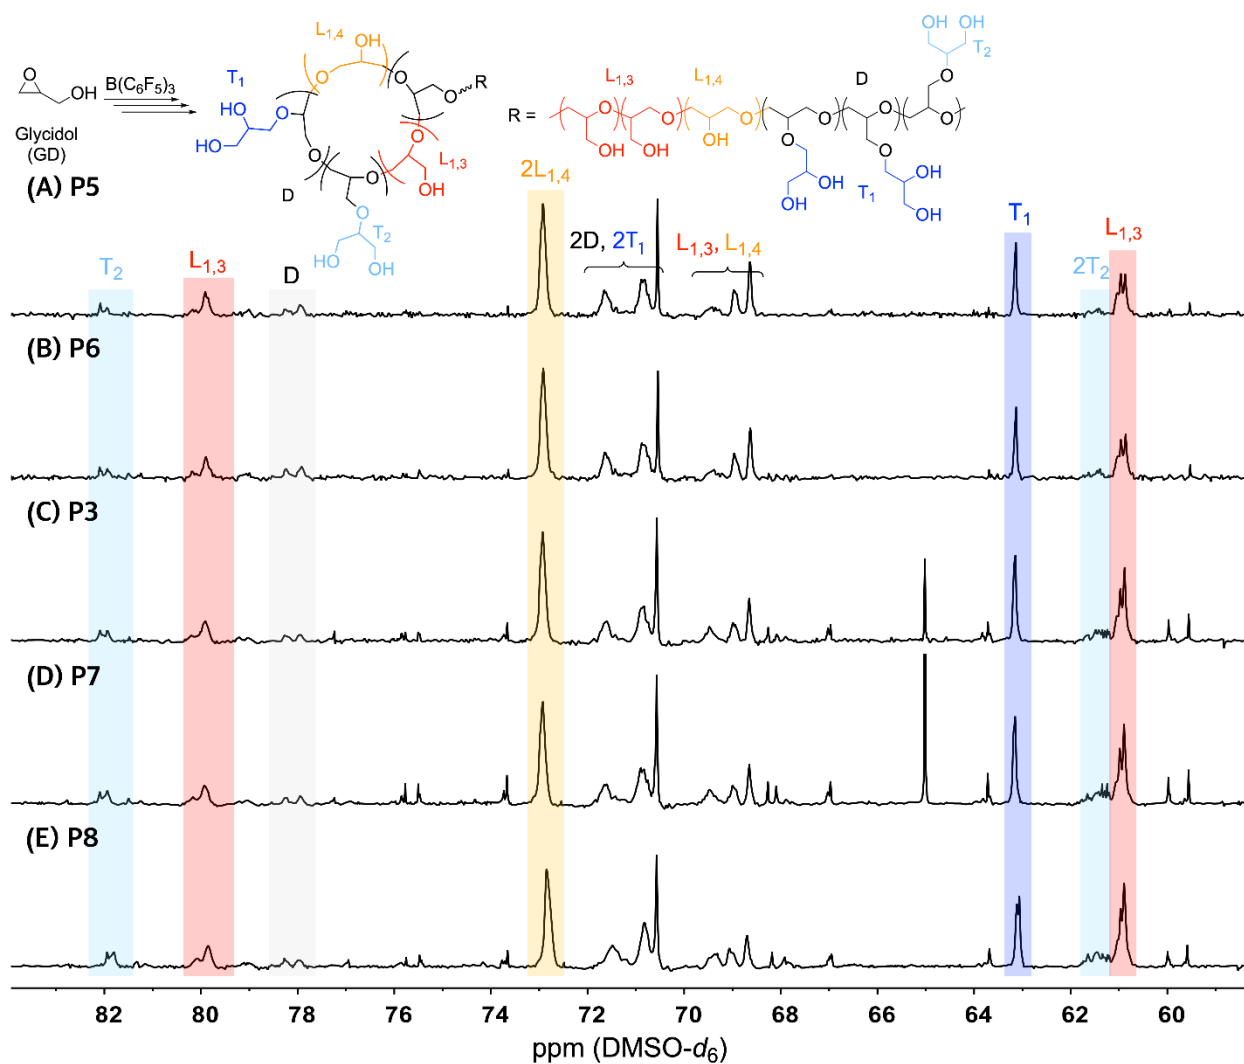

**Figure S4.** Inverse-gated  $^{13}\text{C}$  NMR spectra ( $\text{DMSO-}d_6$ , room temperature) of (A) P5 ( $[\text{GD}]_0 = 500$  mM;  $[\text{B}(\text{C}_6\text{F}_5)_3]_0 = 5$  mM in toluene), (B) P6 ( $[\text{GD}]_0 = 1000$  mM;  $[\text{B}(\text{C}_6\text{F}_5)_3]_0 = 5$  mM in toluene), (C) P3 ( $[\text{GD}]_0 = 2500$  mM;  $[\text{B}(\text{C}_6\text{F}_5)_3]_0 = 5$  mM in toluene), (D) P7 ( $[\text{GD}]_0 = 5000$  mM;  $[\text{B}(\text{C}_6\text{F}_5)_3]_0 = 5$  mM in toluene), and (E) P8 ( $[\text{GD}]_0 = 10000$  mM;  $[\text{B}(\text{C}_6\text{F}_5)_3]_0 = 5$  mM in toluene).

**(A) Effect of BCF Concentration**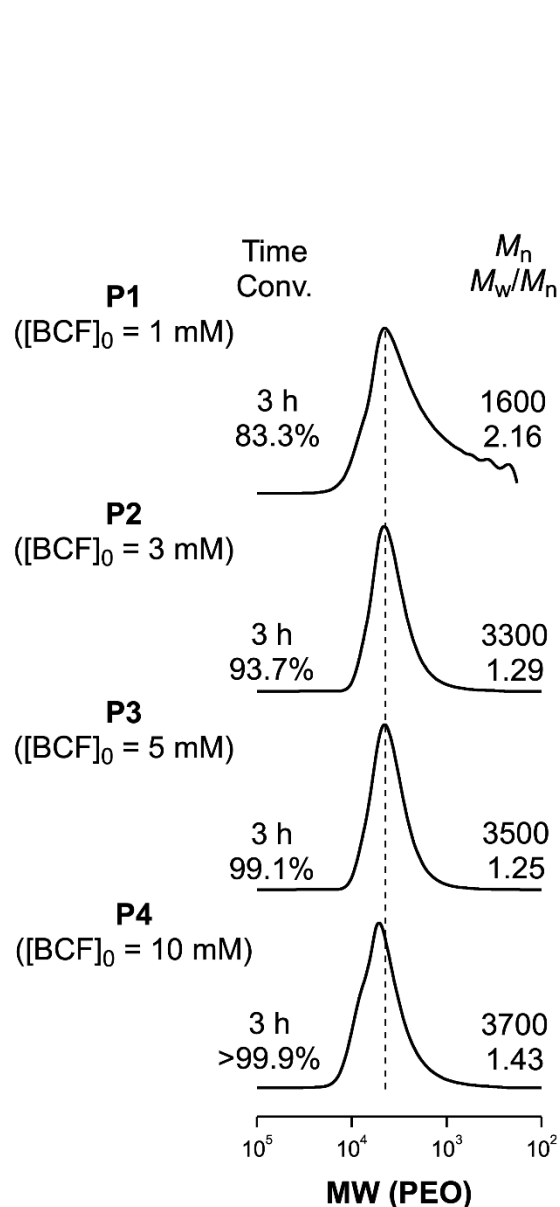**(B) Effect of GD Concentration**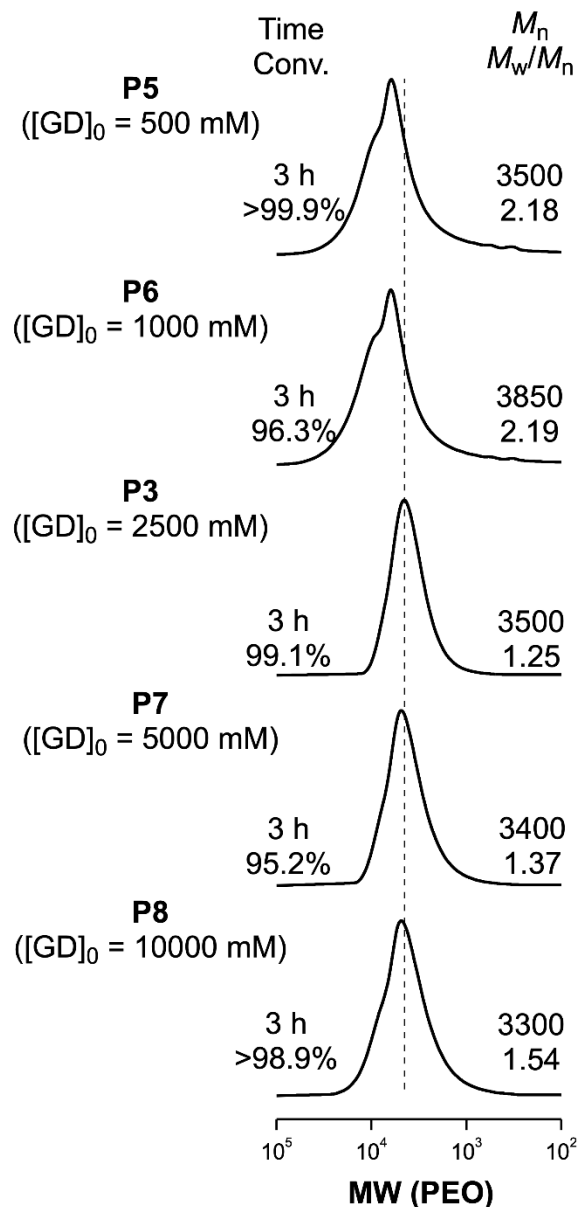

**Figure S5.** SEC curves of BC-PGDs obtained via the metal-free CROP of GD for studying the effects of the polymerization parameters: (A) BCF concentration ( $[GD]_0 = 2500$  mM;  $[B(C_6F_5)_3]_0 = 1, 3, 5,$  or  $10$  mM in toluene at  $-40$  °C) and (B) GD concentration ( $[GD]_0 = 500, 1000, 2500, 5000,$  or  $10,000$  mM;  $[B(C_6F_5)_3]_0 = 5$  mM in toluene at  $-40$  °C).

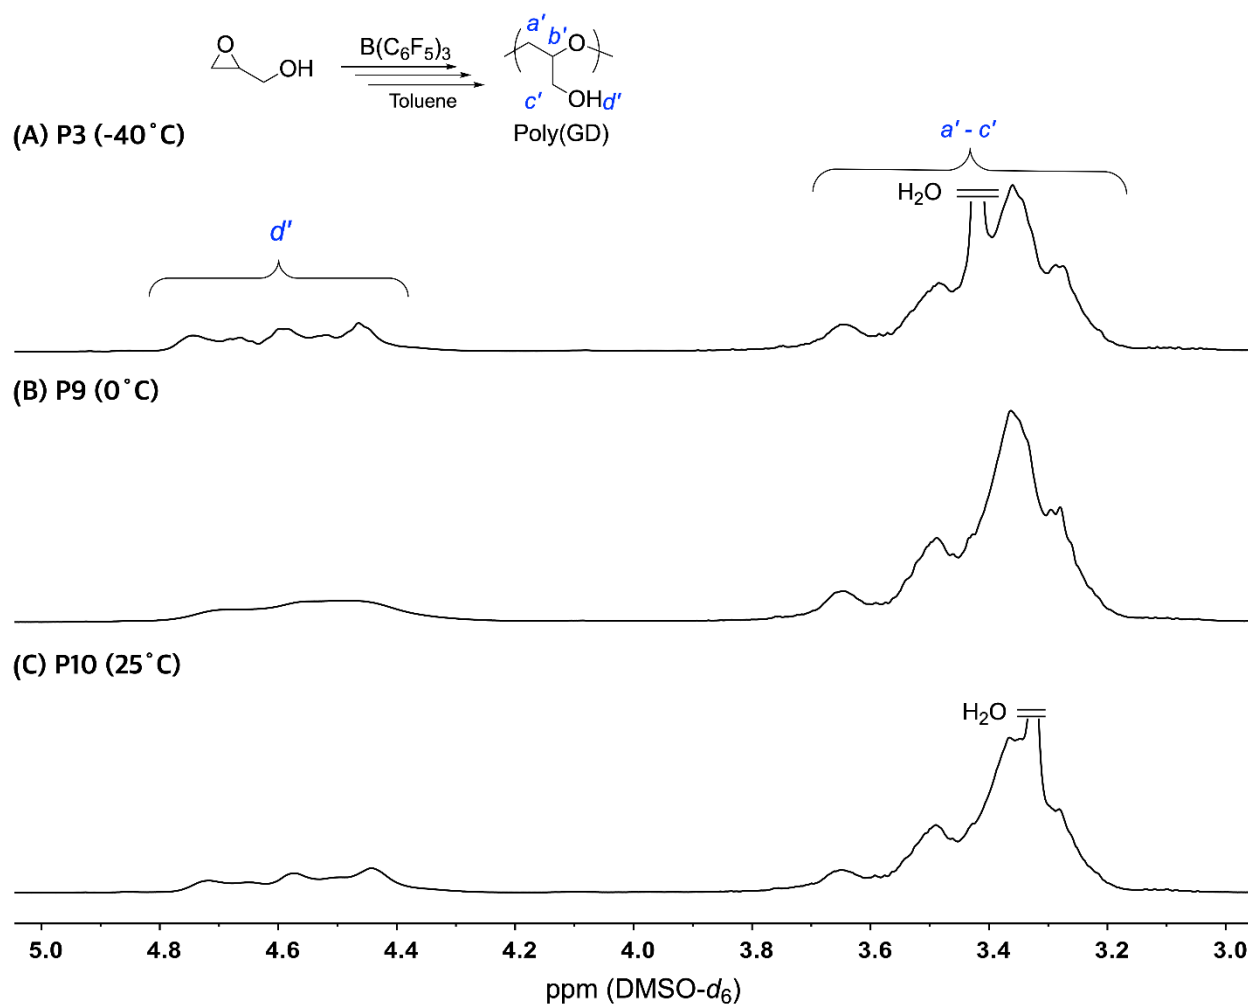

**Figure S6.**  $^1\text{H}$  NMR spectra (DMSO- $d_6$ , room temperature) of (A) P3 ( $[\text{GD}]_0 = 2500 \text{ mM}$ ;  $[\text{B}(\text{C}_6\text{F}_5)_3]_0 = 5 \text{ mM}$  in toluene at  $-40 \text{ }^\circ\text{C}$ ), (B) P9 ( $[\text{GD}]_0 = 2500 \text{ mM}$ ;  $[\text{B}(\text{C}_6\text{F}_5)_3]_0 = 5 \text{ mM}$  in toluene at  $0 \text{ }^\circ\text{C}$ ), and (C) P10 ( $[\text{GD}]_0 = 2500 \text{ mM}$ ;  $[\text{B}(\text{C}_6\text{F}_5)_3]_0 = 5 \text{ mM}$  in toluene at  $25 \text{ }^\circ\text{C}$ ).

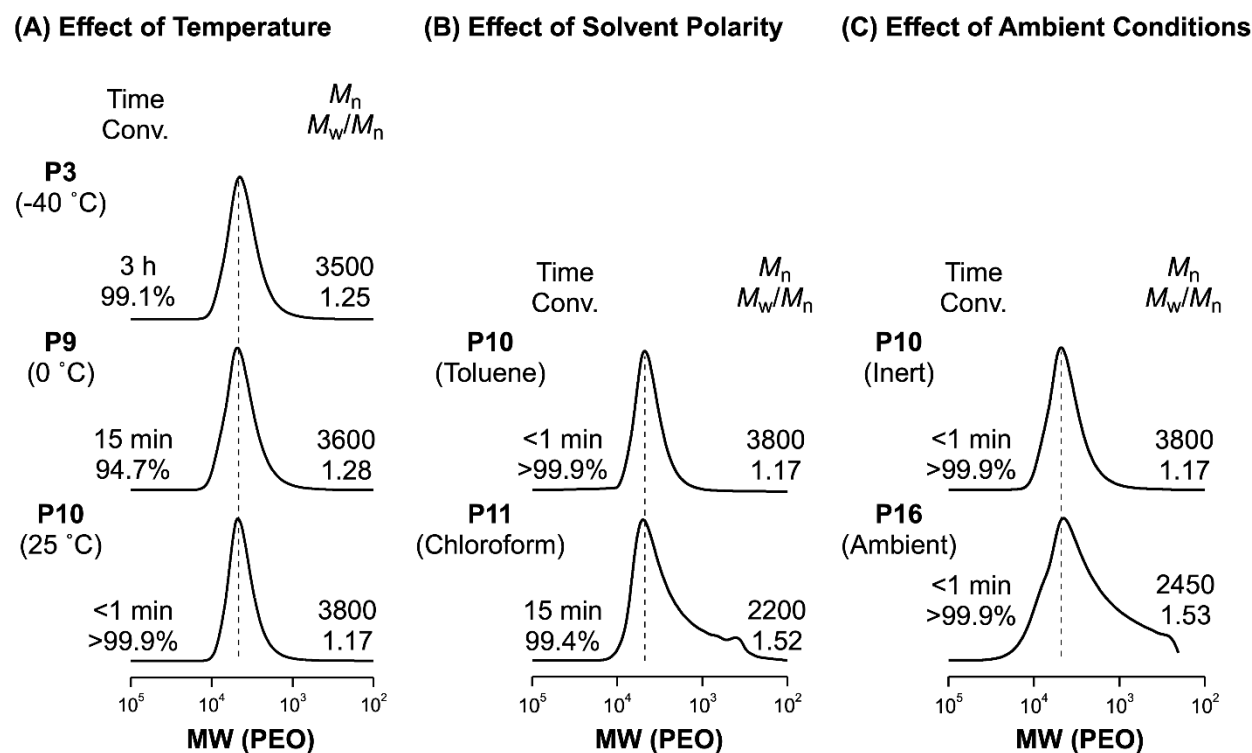

**Figure S7.** SEC curves of BC-PGDs obtained via the metal-free CROP of GD for studying the effects of the polymerization parameters: (A) reaction temperatures ( $[GD]_0 = 2500$  mM;  $[B(C_6F_5)_3]_0 = 5$  mM in toluene at  $-40, 0, 25$  °C), (B) solvent polarity ( $[GD]_0 = 2500$  mM;  $[B(C_6F_5)_3]_0 = 5$  mM in toluene or chloroform at  $25$  °C), and (C) ambient conditions ( $[GD]_0 = 2500$  mM;  $[B(C_6F_5)_3]_0 = 5$  mM in toluene at  $25$  °C under inert atmosphere using purified GD and toluene or under ambient conditions using unpurified GD and toluene).



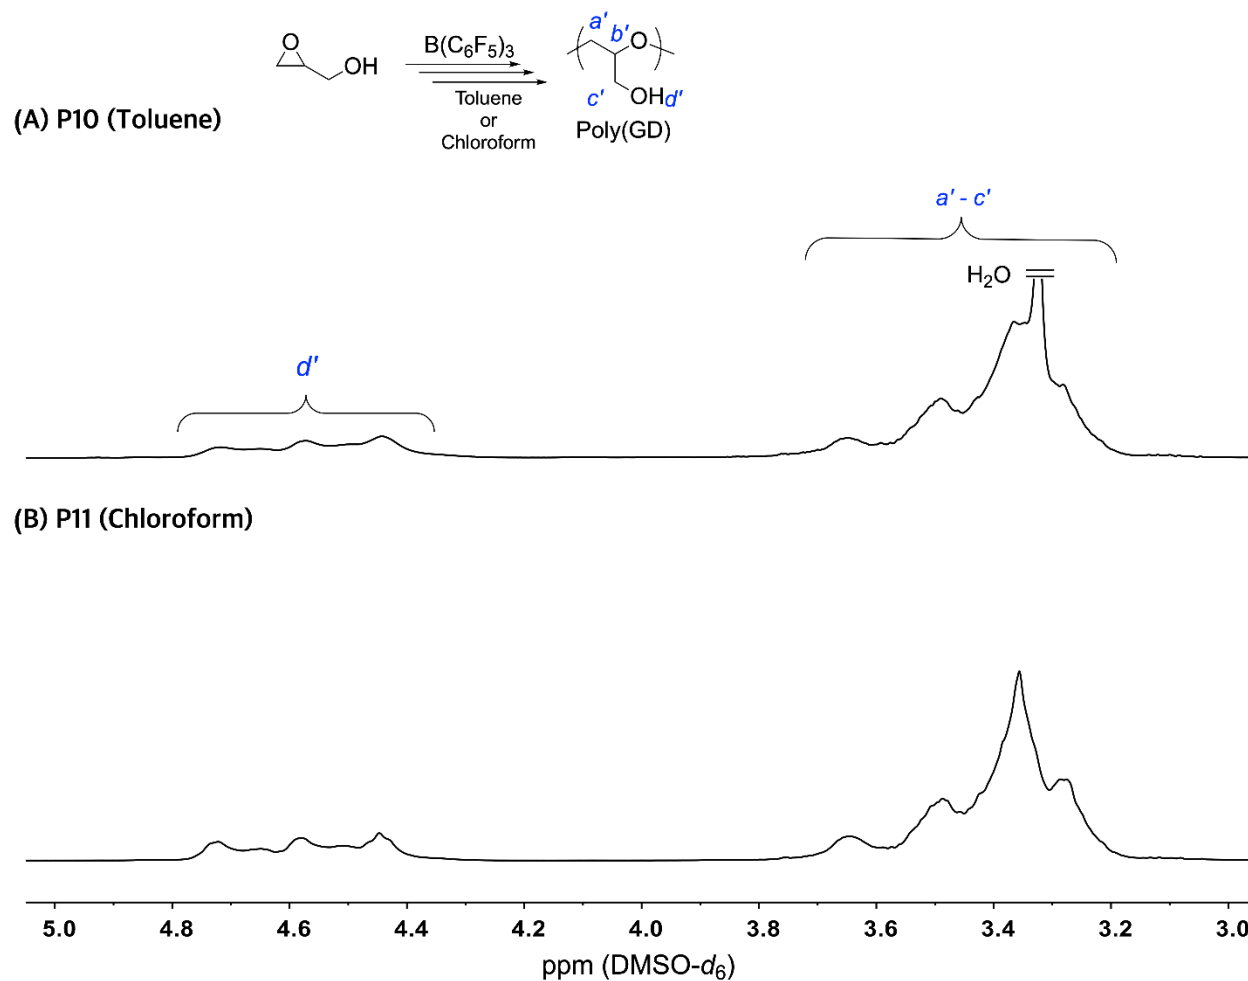

**Figure S8.**  $^1\text{H}$  NMR spectra (DMSO- $d_6$ , room temperature) of (A) P10 ( $[\text{GD}]_0 = 2500$  mM;  $[\text{B}(\text{C}_6\text{F}_5)_3]_0 = 5$  mM in toluene at 25 °C) and (B) P11 ( $[\text{GD}]_0 = 2500$  mM;  $[\text{B}(\text{C}_6\text{F}_5)_3]_0 = 5$  mM in chloroform at 25 °C).

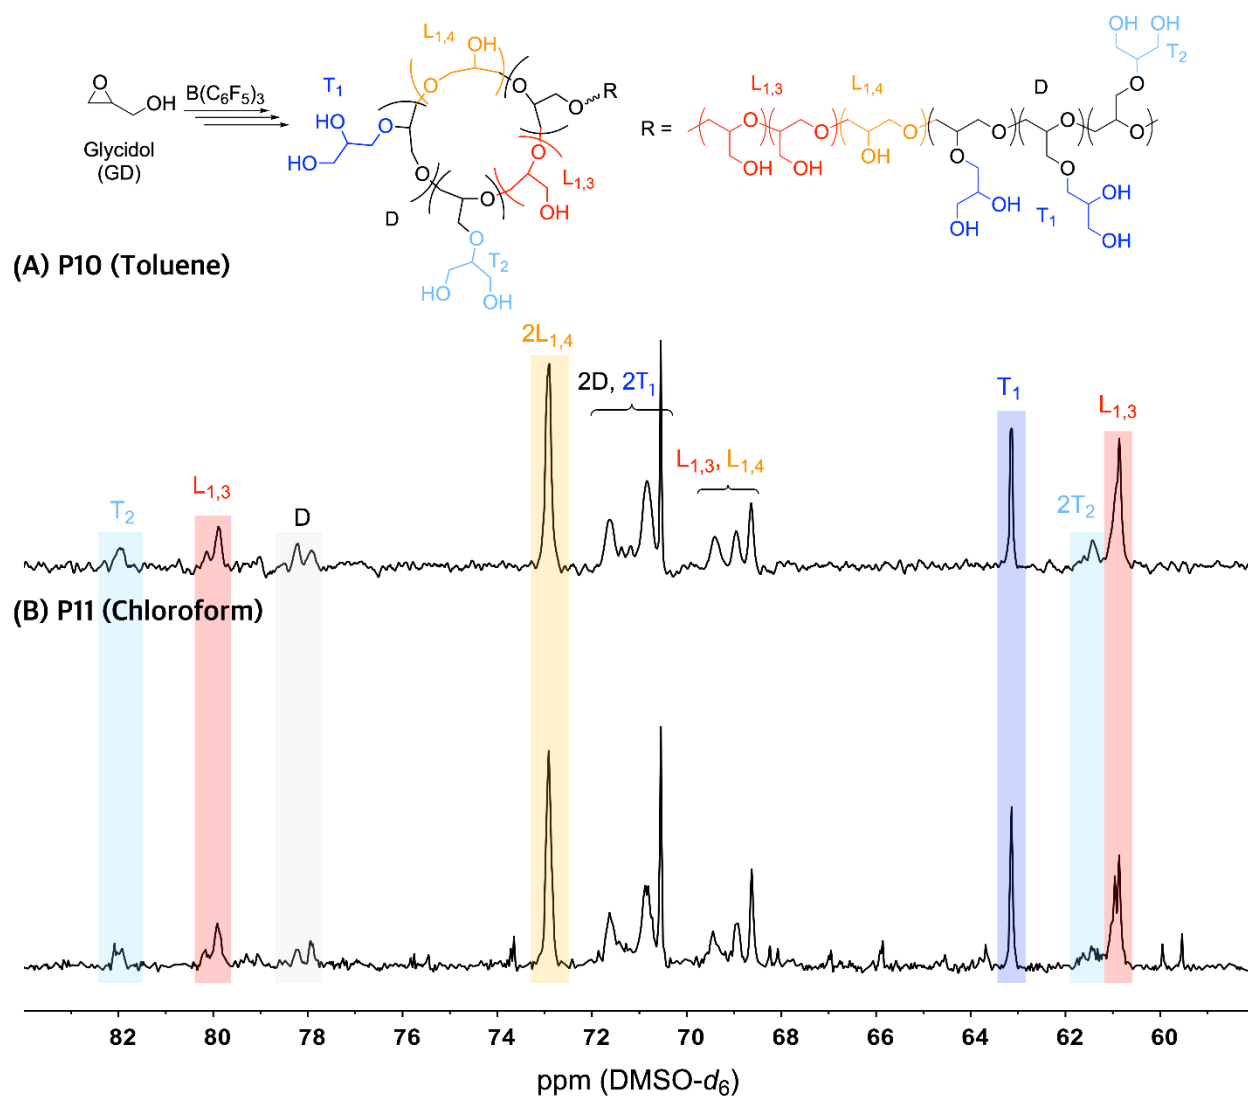

**Figure S9.** Inverse-gated  $^{13}\text{C}$  NMR spectra (DMSO- $d_6$ , room temperature) of (A) P10 ( $[\text{GD}]_0 = 2500 \text{ mM}$ ;  $[\text{B}(\text{C}_6\text{F}_5)_3]_0 = 5 \text{ mM}$  in toluene at  $25 \text{ }^\circ\text{C}$ ) and (B) P11 ( $[\text{GD}]_0 = 2500 \text{ mM}$ ;  $[\text{B}(\text{C}_6\text{F}_5)_3]_0 = 5 \text{ mM}$  in chloroform at  $25 \text{ }^\circ\text{C}$ ).

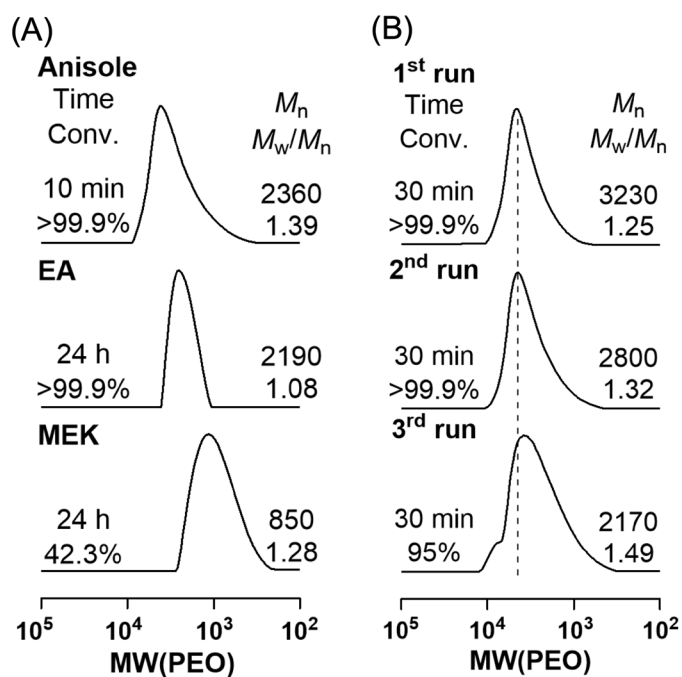

**Figure S10.** SEC curves of (A) BC-PGDs obtained via the metal-free CROP of GD in green solvents and (B) recyclable polymerization in anisole (1<sup>st</sup> polymerization:  $[GD]_0 = 2500$  mM;  $[B(C_6F_5)_3]_0 = 5$  mM at 25 °C; 2<sup>nd</sup>-3<sup>rd</sup> polymerization:  $[GD]_{add} = 2500$  mM).

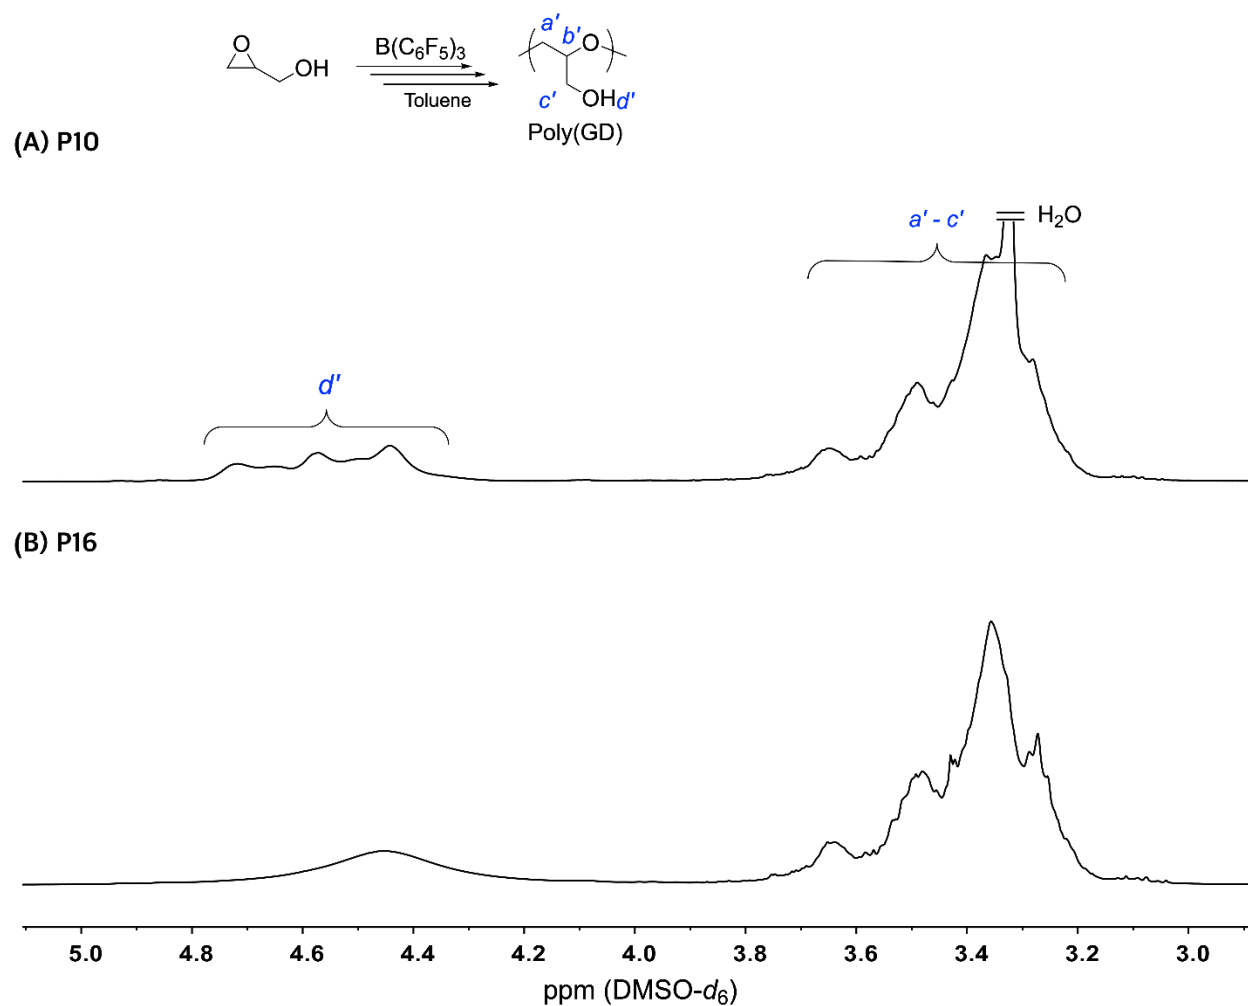

**Figure S11.**  $^1\text{H}$  NMR spectra (DMSO- $d_6$ , room temperature) of (A) P10 ( $[\text{GD}]_0 = 2500$  mM;  $[\text{B}(\text{C}_6\text{F}_5)_3]_0 = 5$  mM in toluene under inert conditions) and (B) P16 ( $[\text{GD}]_0 = 2500$  mM;  $[\text{B}(\text{C}_6\text{F}_5)_3]_0 = 5$  mM in toluene under ambient conditions using unpurified GD and toluene).

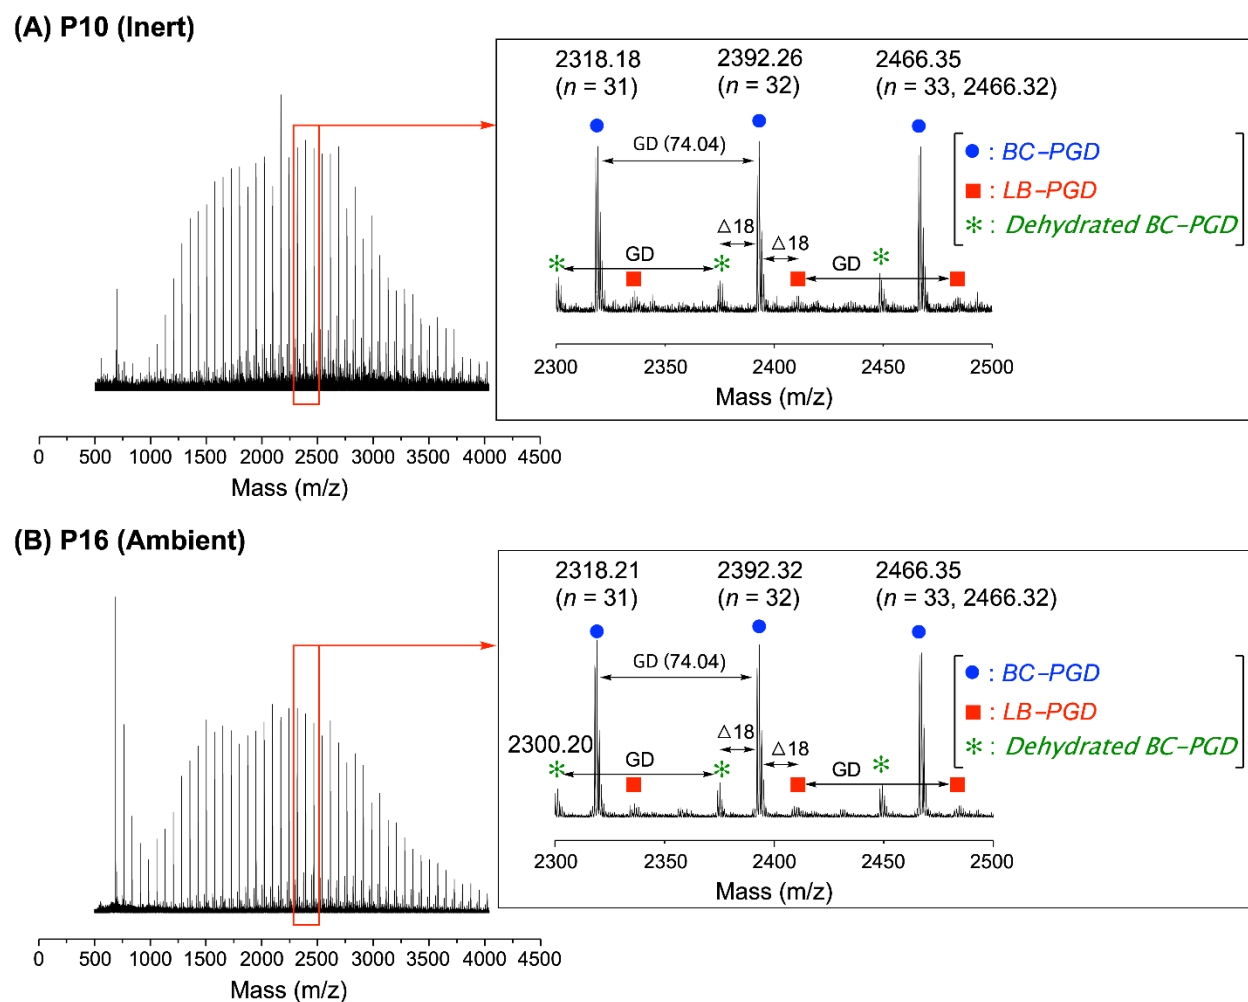

**Figure S12.** MALDI-TOF mass spectrum of (A) P10 (prepared under inert conditions with purified GD and solvent) and (B) P16 (prepared under ambient conditions using unpurified GD and solvent).

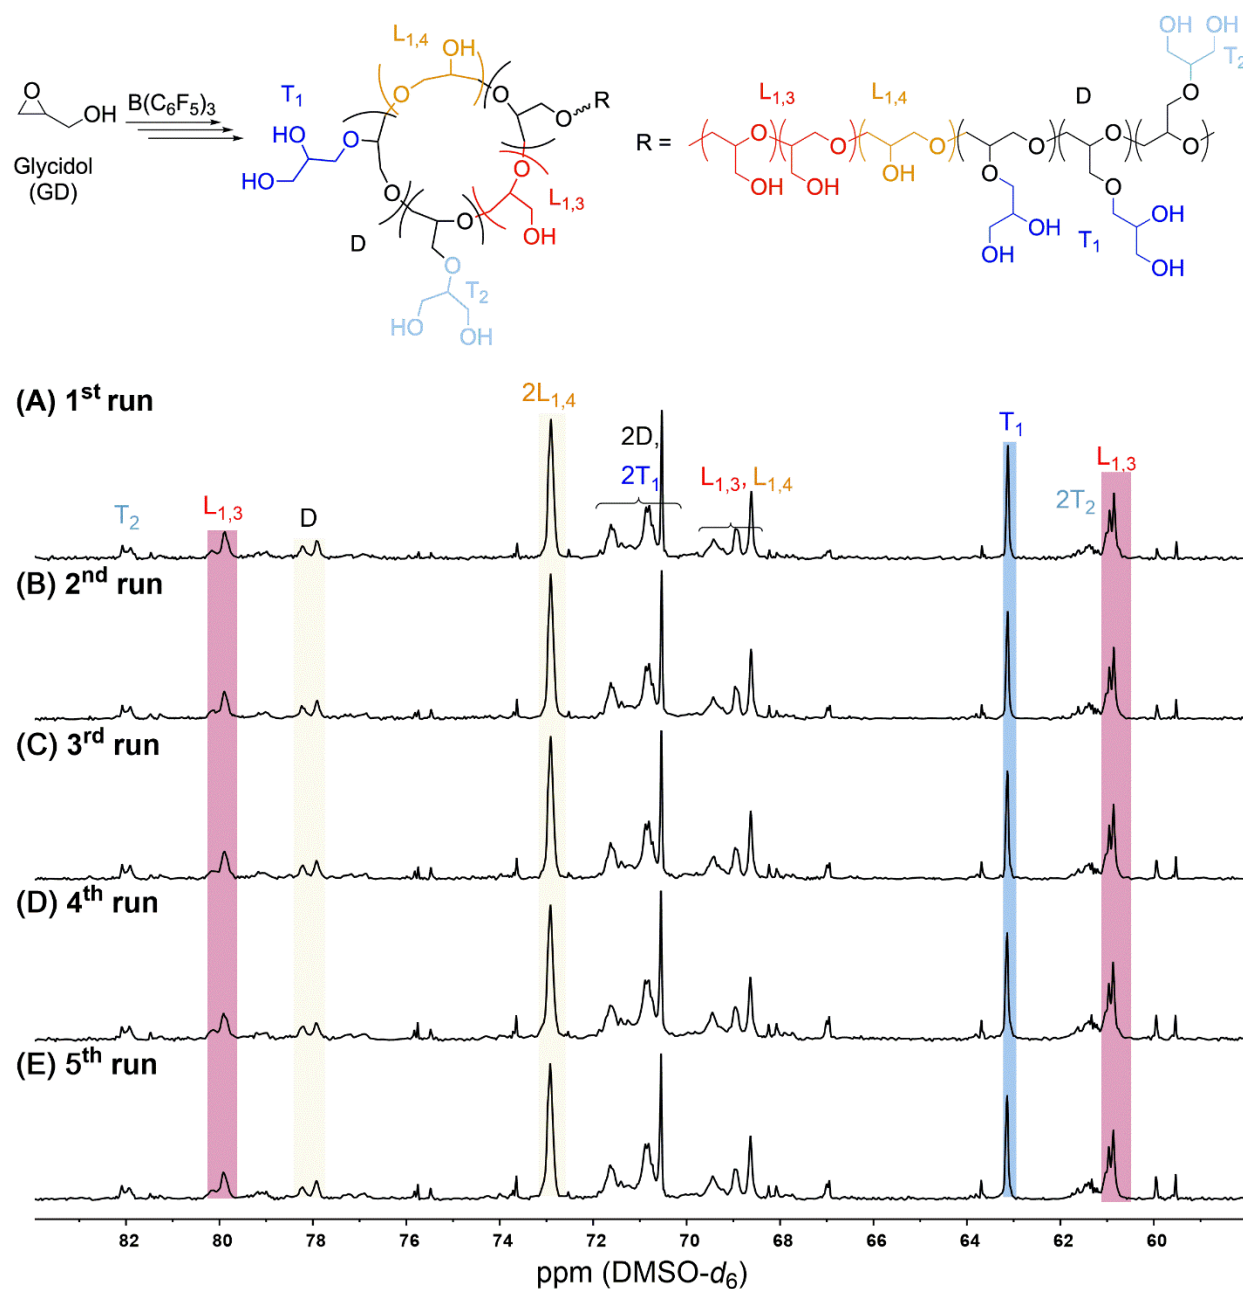

**Figure S13.** Inverse-gated  $^{13}\text{C}$  NMR spectra ( $\text{DMSO-}d_6$ , room temperature) of the obtained PGDs from the (A) first, (B) second, and (C) third polymerizations under ambient conditions using unpurified GD and solvent.

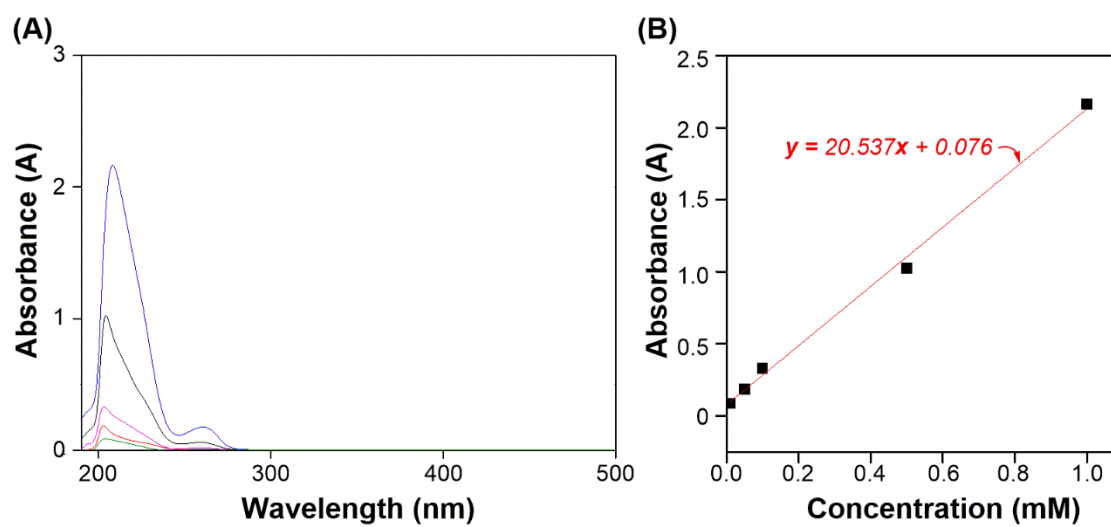

**Figure S14.** (A) Absorption spectra of BCF solution from 0.005 mM to 0.1 mM in methanol and (B) the calibration curve depending on the BCF concentration.

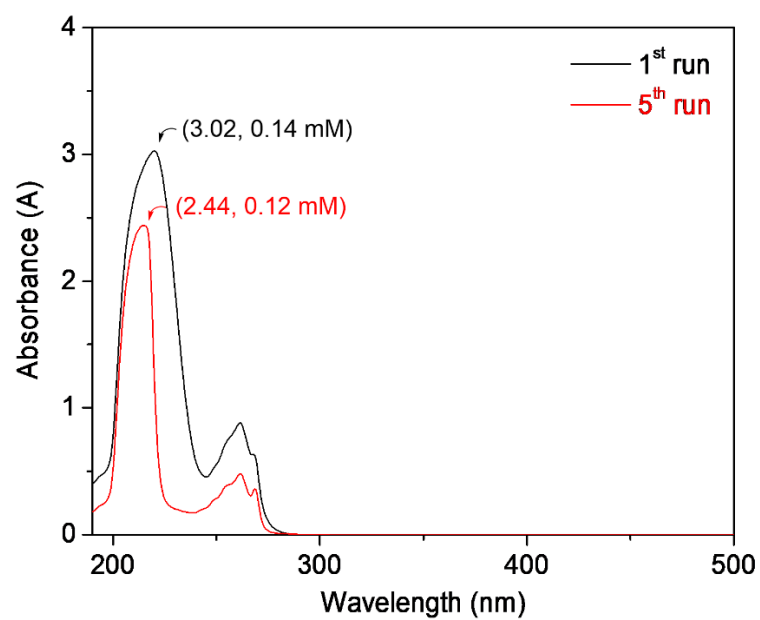

**Figure S15.** Absorption spectra of the obtained PGDs from the first and fifth polymerizations (10 mg/mL in methanol).



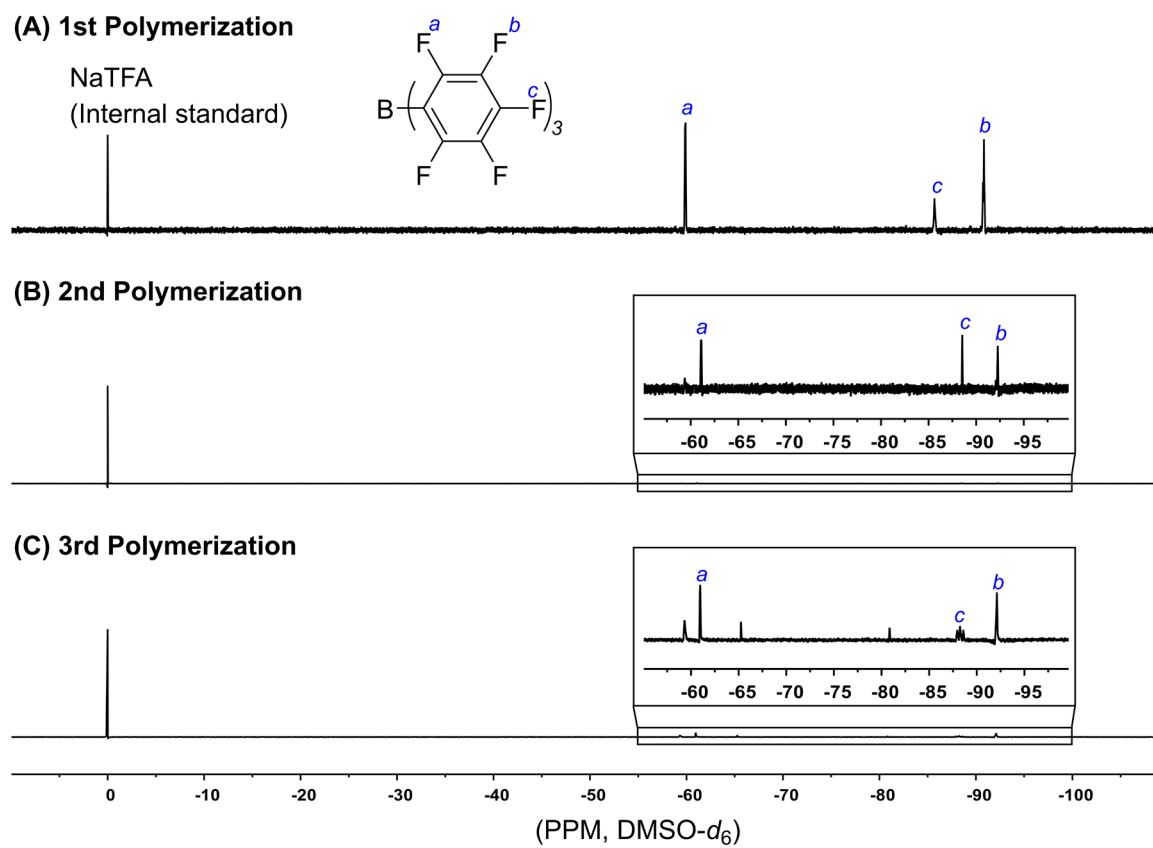

**Figure S16.**  $^{19}\text{F}$  NMR spectra of PGDs collected from recyclable polymerization (200 mg/mL PGD with 0.29 mM Na-TFA).

**Table S1.** Effects of reaction temperature and ambient conditions on the polymer structure.<sup>a, b</sup>

| Region                                 | Chemical shift (ppm)     | P3 (-40 °C) | P9 (0 °C)   | P10 (25 °C) | P16 (25 °C) <sup>c</sup> |
|----------------------------------------|--------------------------|-------------|-------------|-------------|--------------------------|
| L <sub>1,3</sub>                       | 60.6–61.2                | 6.23        | 4.64        | 4.53        | 4.21                     |
| 2T <sub>2</sub>                        | 61.2–61.8                | 1.23        | 1.99        | 1.43        | 2.23                     |
| T <sub>1</sub>                         | 63.0–63.3                | 3.33        | 2.51        | 2.35        | 2.32                     |
| L <sub>1,3</sub> , L <sub>1,4</sub>    | 68.5–69.7                | 6.02        | 5.56        | 5.84        | 5.15                     |
| 2D, 2T <sub>1</sub>                    | 70.4–72.0                | 13.82       | 12.21       | 11.49       | 11.02                    |
| 2L <sub>1,4</sub>                      | 72.7–73.2                | 10.28       | 6.39        | 5.70        | 5.28                     |
| D                                      | 77.7–78.9                | 1.64        | 1.64        | 1.88        | 1.41                     |
| L <sub>1,3</sub>                       | 79.7–80.4                | 2.72        | 2.73        | 2.21        | 2.11                     |
| T <sub>2</sub>                         | 81.5–82.2                | 1.00        | 1.00        | 1.00        | 1.00                     |
| <b>Structure units (%)<sup>d</sup></b> |                          |             |             |             |                          |
| <b>D units</b>                         |                          | <b>9</b>    | <b>12</b>   | <b>14</b>   | <b>12</b>                |
| <b>L units</b>                         |                          | <b>66</b>   | <b>61</b>   | <b>59</b>   | <b>59</b>                |
|                                        | (L <sub>1,3</sub> units) | (36)        | (36)        | (36)        | (36)                     |
|                                        | (L <sub>1,4</sub> units) | (30)        | (25)        | (23)        | (23)                     |
| <b>T units</b>                         |                          | <b>25</b>   | <b>27</b>   | <b>27</b>   | <b>29</b>                |
|                                        | (T <sub>1</sub> units)   | (18)        | (19)        | (19)        | (20)                     |
|                                        | (T <sub>2</sub> units)   | (7)         | (8)         | (8)         | (9)                      |
| <b>Degree of Branching<sup>e</sup></b> |                          | <b>0.34</b> | <b>0.39</b> | <b>0.41</b> | <b>0.41</b>              |

<sup>a</sup>[GD]<sub>0</sub> = 2500 mM, [B(C<sub>6</sub>F<sub>5</sub>)<sub>3</sub>]<sub>0</sub> = 5 mM in toluene. <sup>b</sup>Obtained by inverse-gated <sup>13</sup>C NMR. <sup>c</sup>The polymerization was performed under ambient conditions using unpurified monomer and solvent. <sup>d</sup>The structure units (%) were calculated using the following equation: integration ratio of each structure region/(D + T + L) × 100. <sup>e</sup>Degree of branching = (D + T)/(D + T + L).

**Table S2.** Influence of the recycled polymerization solution in ambient conditions on the polymer structure.<sup>a, b, c</sup>

|                                        | 1 <sup>st</sup> run | 2 <sup>nd</sup> run | 3 <sup>rd</sup> run | 4 <sup>th</sup> run | 5 <sup>th</sup> run |
|----------------------------------------|---------------------|---------------------|---------------------|---------------------|---------------------|
| <b>Structure units (%)<sup>d</sup></b> |                     |                     |                     |                     |                     |
| <b>D units</b>                         | <b>11</b>           | <b>10</b>           | <b>11</b>           | <b>11</b>           | <b>11</b>           |
| <b>L units</b>                         | <b>61</b>           | <b>62</b>           | <b>61</b>           | <b>62</b>           | <b>61</b>           |
| (L <sub>1,3</sub> units)               | (32)                | (34)                | (32)                | (32)                | (31)                |
| (L <sub>1,4</sub> units)               | (29)                | (28)                | (29)                | (30)                | (30)                |
| <b>T units</b>                         | <b>28</b>           | <b>28</b>           | <b>28</b>           | <b>27</b>           | <b>28</b>           |
| (T <sub>1</sub> units)                 | (23)                | (23)                | (22)                | (22)                | (22)                |
| (T <sub>2</sub> units)                 | (5)                 | (5)                 | (5)                 | (5)                 | (6)                 |
| <b>Degree of Branching<sup>e</sup></b> | <b>0.40</b>         | <b>0.39</b>         | <b>0.39</b>         | <b>0.37</b>         | <b>0.39</b>         |

<sup>a</sup>[GD]<sub>0</sub> = 500 mM, [B(C<sub>6</sub>F<sub>5</sub>)<sub>3</sub>]<sub>0</sub> = 5 mM in toluene. <sup>b</sup>Obtained by inverse-gated <sup>13</sup>C NMR. <sup>c</sup>The polymerization was performed under ambient conditions using the unpurified monomer and solvent. <sup>d</sup>The structure units (%) were calculated using the following equation: integration ratio of each structure region/(D + T + L) × 100. <sup>e</sup>Degree of branching (DB) = (D + T)/(D + T + L).
